# Supplementary material for: Efficacy and Safety/Toxicity Study of Recombinant Vaccinia Virus JX-594 in Two Immunocompetent Animal Models of Glioma
Source: PubMed Central journal article supplement — Mol Ther. 2010 Aug 31;18(11):1927–36. doi: 10.1038/mt.2010.183 (PMC2990519; doi:10.1038/mt.2010.183), 2010-08-31
Supplement: mt2010183x3.pdf [file mt2010183x3.pdf]

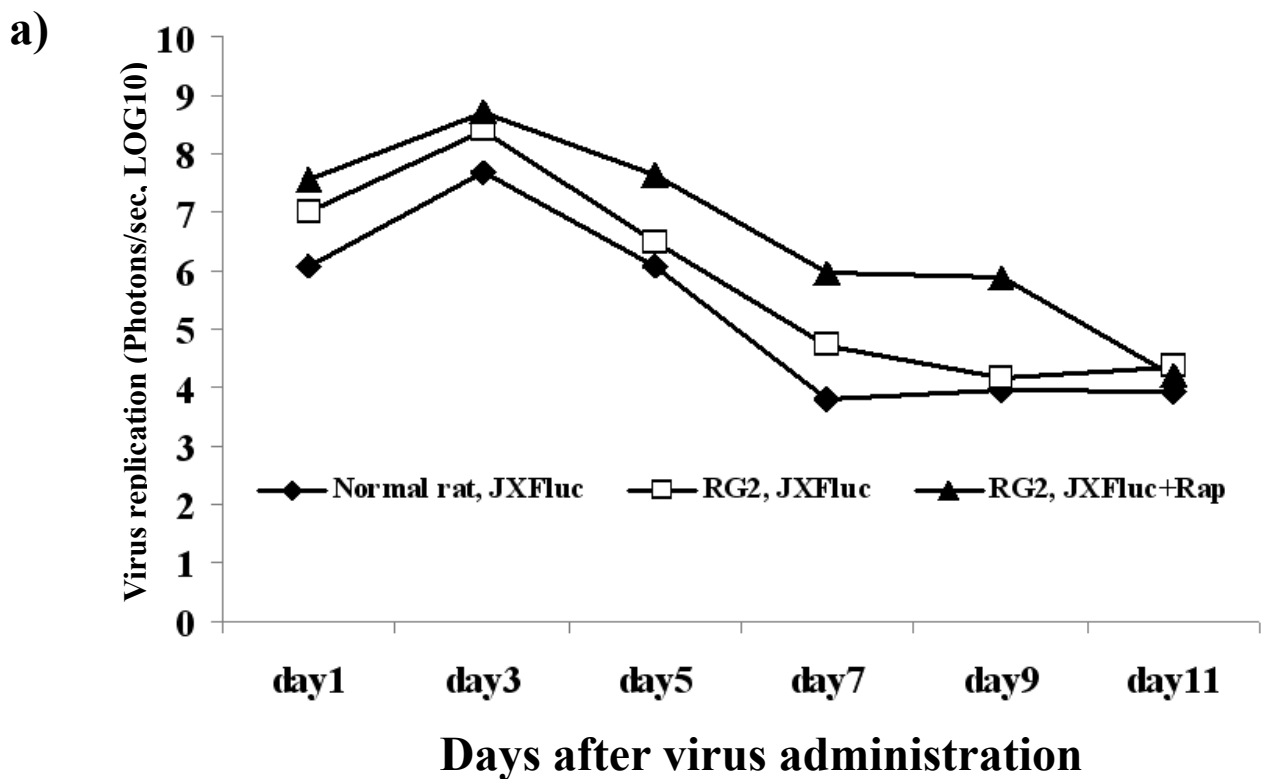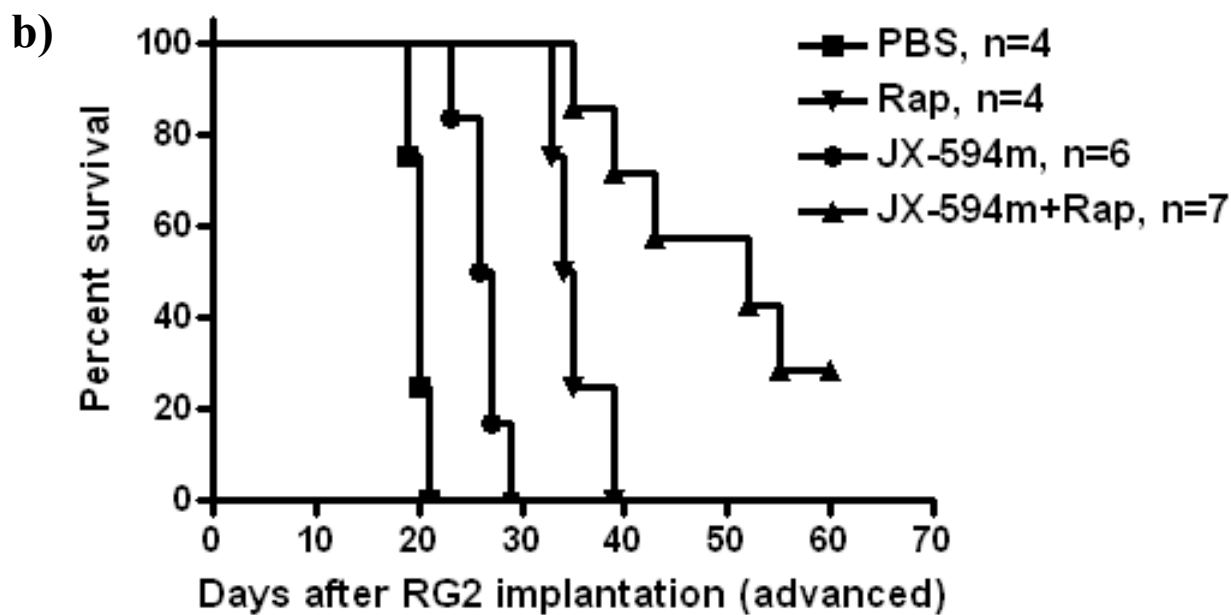

**Supp. Fig. 4.** a) Combination therapy with rapamycin enhanced JX-594Fluc replication in glioma bearing animal model. b) Survival curve of JX-594m combination with rapamycin.

**Figure S3ab**
