# Supplementary material for: Efficacy and Safety/Toxicity Study of Recombinant Vaccinia Virus JX-594 in Two Immunocompetent Animal Models of Glioma
Source: PubMed Central journal article supplement — Mol Ther. 2010 Aug 31;18(11):1927–36. doi: 10.1038/mt.2010.183 (PMC2990519; doi:10.1038/mt.2010.183), 2010-08-31
Supplement: mt2010183x4.pdf [file mt2010183x4.pdf]

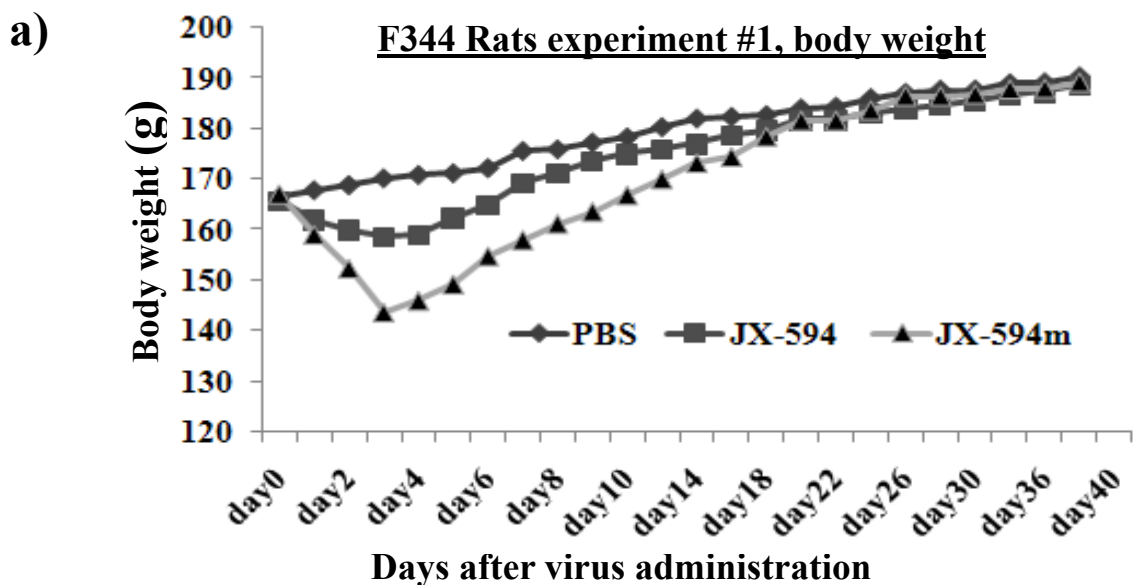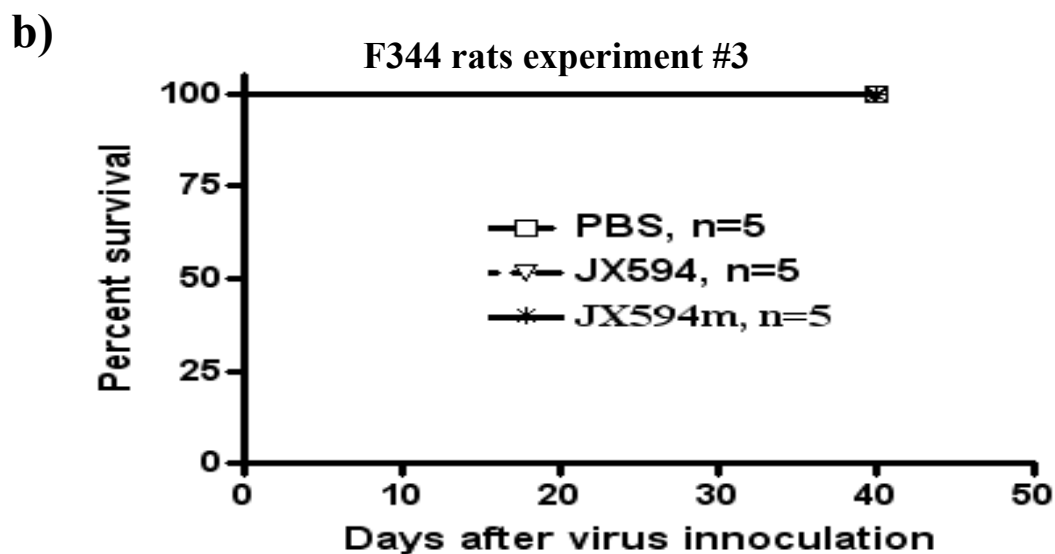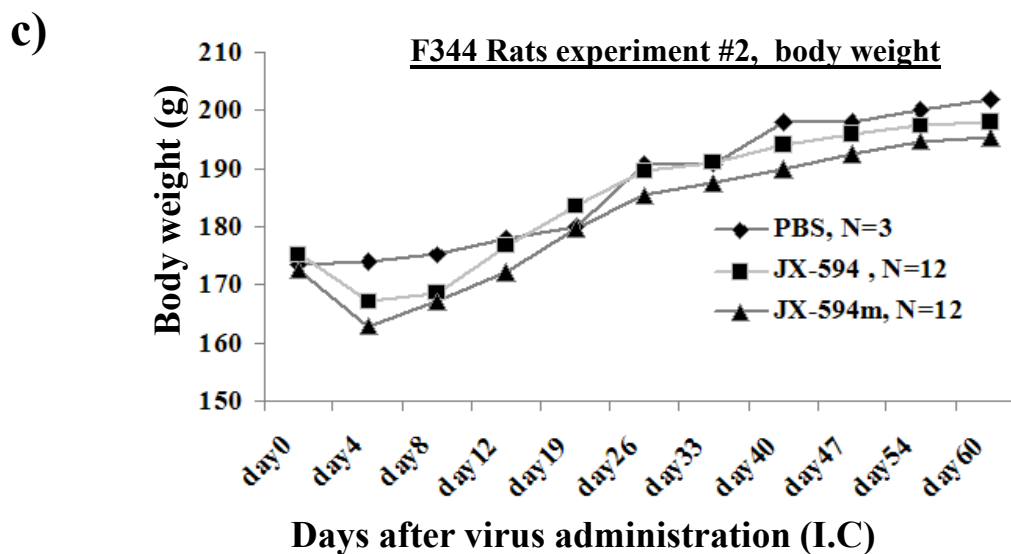

Figure S4a, b, c

d)

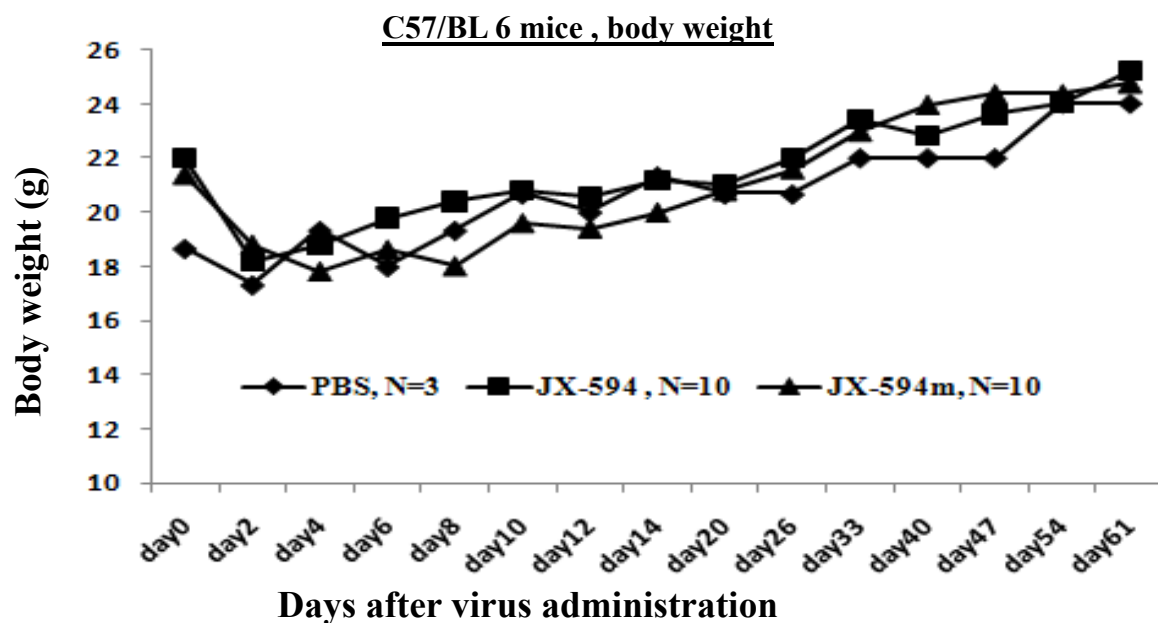

**Supp. Fig 2. JX-594 and JX-594m safety/toxicity study in immunocompetent F344 rats and C57/bl6 mice** a) Representative mean body weight (g) is shown after i.c. injection of JX-594 and JX-594m (N=6) in normal F344 rats. b) Representative survival curve of non-tumor bearing normal F344 rats I.C administrated JX-594 or JX-594m ( n=5). c) Mean body weight (g) is shown after i.c. injection of JX-594, JX-594m (n=12) in normal F344 rats. d) Representative mean body weight (g) after i.c. injection of JX-594, JX-594m ( n=10) in C57/BL6 mice.

**Figure S4d**
