# Supplementary material for: Efficacy and Safety/Toxicity Study of Recombinant Vaccinia Virus JX-594 in Two Immunocompetent Animal Models of Glioma
Source: PubMed Central journal article supplement — Mol Ther. 2010 Aug 31;18(11):1927–36. doi: 10.1038/mt.2010.183 (PMC2990519; doi:10.1038/mt.2010.183), 2010-08-31
Supplement: mt2010183x5.pdf [file mt2010183x5.pdf]

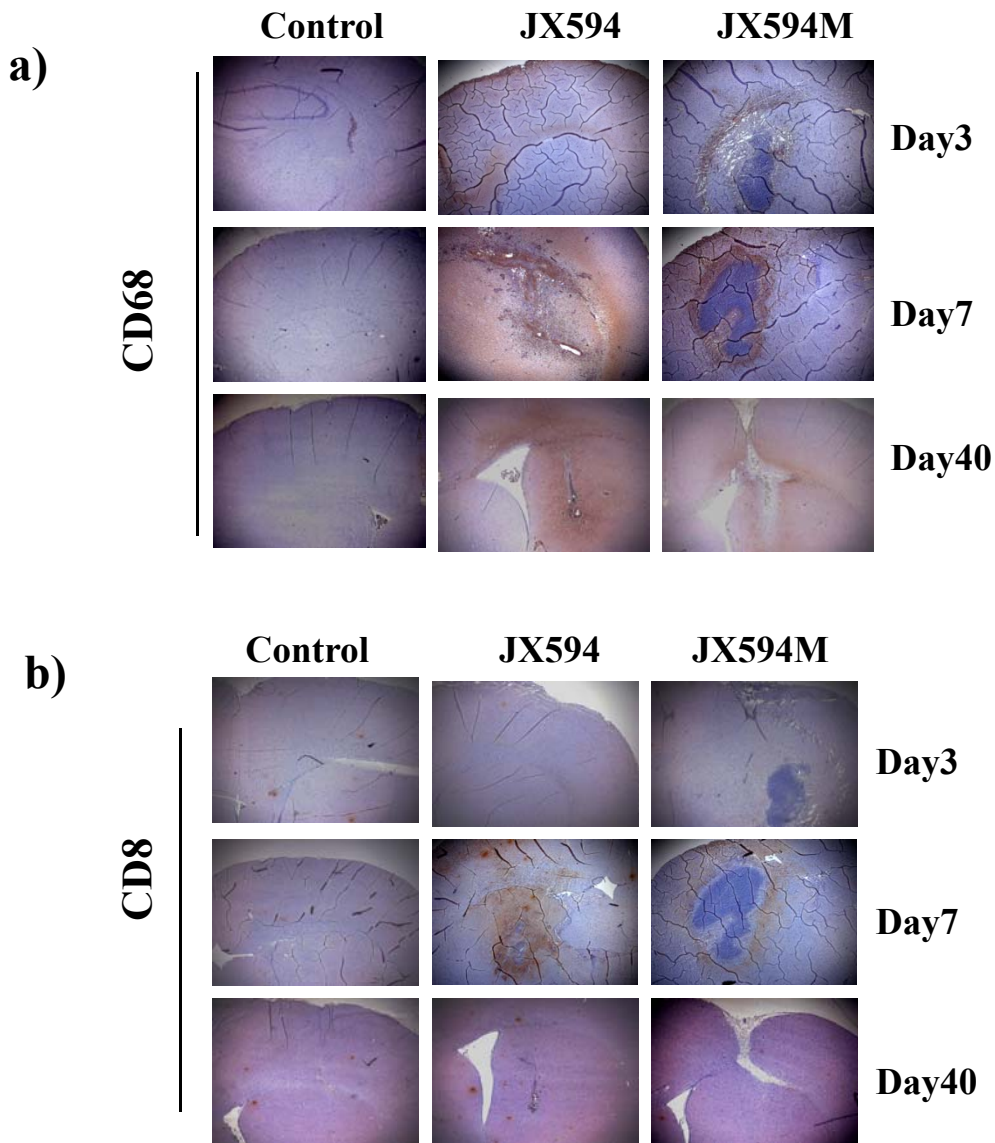

**Supp. Fig. 3. JX-594 and JX-594m safety/toxicity study in immunocompetent F344 rats** a, b) Representative CD68 /CD8 infiltration *in vivo* measured by IHC in the brain following JX-594 and JX-594m (4E8PFU/kg,) i.c. administration at 3, 7 and 40 days after virus administration (magnification, 25x).

**Figure S5a, b**
